# Supplementary material
Source: Springer Nature journal article supplement (https://www.springermedizin.de/resource/supplementary/40478_2013_15_MOESM4_ESM.pdf/25657964)

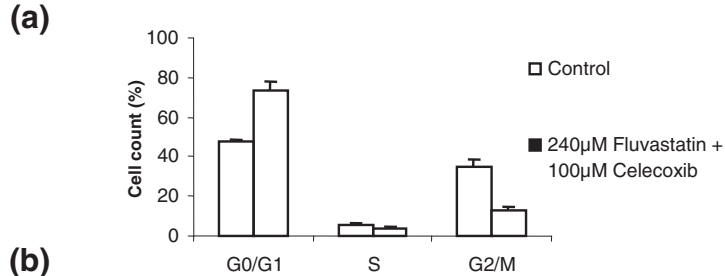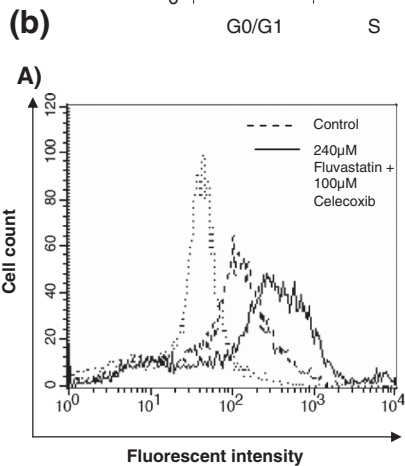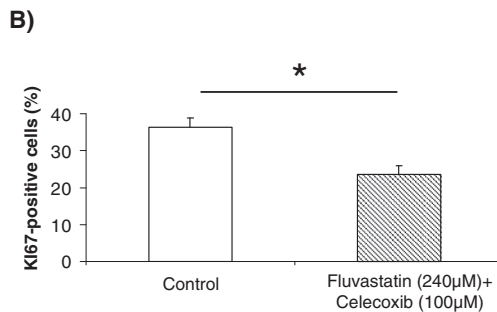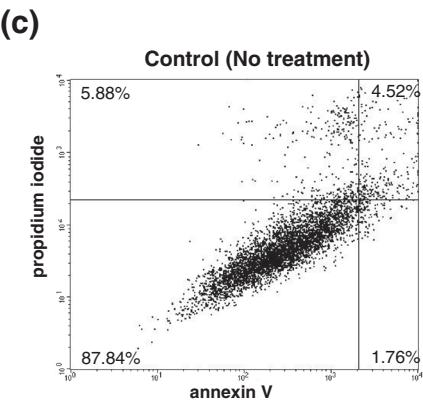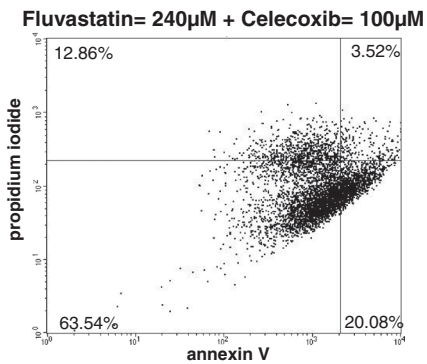

Supplement: MOESM4 [file 25657964]
